# Supplementary material
Source: publisher site journal article supplement (https://www.dovepress.com/article/612119)
Supplement: Supplementary file 1 [file 612119_supplementary%20materials%20CLEAN.docx]

**Supplementary Table S1** Characteristics of interview participants (n=12)

| No. | Gender | Age | Educational level | GOLD stage | Disease duration, years |
| --- | --- | --- | --- | --- | --- |
| N1 | Male | 58 | Senior high school | 2 | 2 |
| N2 | Female | 66 | Junior high school | 4 | 12 |
| N3 | Female | 45 | Junior college | 1 | 0.5 |
| N4 | Male | 67 | Primary school | 3 | 8 |
| N5 | Male | 70 | No formal education | 3 | 5 |
| N6 | Female | 61 | Primary school | 2 | 2 |
| N7 | Male | 72 | No formal education | 3 | 7 |
| N8 | Female | 69 | Primary school | 4 | 9 |
| N9 | Male | 59 | Junior high school | 1 | 1 |
| N10 | Female | 60 | Primary school | 4 | 3 |
| N11 | Male | 55 | Junior high school | 2 | 7 |
| N12 | Female | 63 | No formal education | 4 | 13 |

**Supplementary Table S2** Characteristics of Delphi experts (n=35)

| Characteristics | Frequency, n | Percentage, % |
| --- | --- | --- |
| Gender |  |  |
| Male | 4 | 11.4 |
| Female | 31 | 88.6 |
| Age, years |  |  |
| 31-39 | 25 | 71.4 |
| 40-49 | 8 | 22.9 |
| ≥50 | 2 | 5.7 |
| Education level |  |  |
| Doctorate | 2 | 5.7 |
| Master’s degree | 11 | 31.4 |
| Bachelor’s degree | 22 | 62.9 |
| Years of work |  |  |
| ≤10 | 1 | 2.9 |
| 11-19 | 23 | 65.7 |
| 20-29 | 9 | 25.7 |
| ≥30 | 2 | 5.7 |
| Professional title |  |  |
| Senior | 8 | 22.9 |
| Associate senior | 9 | 25.7 |
| Intermediate | 18 | 51.4 |
| Area of expertise |  |  |
| Clinical medicine | 9 | 25.7 |
| Nursing | 10 | 28.6 |
| Rehabilitation Therapy | 12 | 34.3 |
| Psychological Therapy | 4 | 11.4 |

**Supplementary Table S3** Characteristics of pilot-test participants (n=20)

| **Variables** | **Categories** | ***N (%)*** |
| --- | --- | --- |
| **Gender** | Male | 15 (75.0) |
| Female | 5 (25.0) |
| **Age, years** | - | 70.85±12.14 |
| **Residence** | City | 14 (70.0) |
| Town | 6 (30.0) |
| **Living alone** | Yes | 3 (15.0) |
| No | 17 (85.0) |
| **Marital status** | Unmarried | 1 (5.0) |
| Married | 19 (95.0) |
| **Education level** | Primary school and below | 10 (50.0) |
| Secondary education | 4 (20.0) |
| High school/technical secondary school | 5 (25.0) |
| College degree | 1 (5.0) |
| **GOLD stage** | 1 | 5 (25.0) |
| 2 | 4 (20.0) |
| 3 | 5 (25.0) |
| 4 | 6 (30.0) |
| **Work status** | Employed | 3 (15.0) |
| Unemployed | 17 (85.0) |
| **Per monthly income (RMB)** | ≤1000 | 8 (40.0) |
| 1001~3000 | 5 (25.0) |
| 3001~5000 | 5 (25.0) |
| ≥5000 | 2 (10.0) |
| **Payment status of medical expenses** | Self-funded | 0 (0) |
| Medical insurance | 20 (100.0) |
| **Duration of COPD (years)** | - | 6.55±4.77 |
| **Smoking status** | Yes | 9 (45.0) |
| Former smoker | 4 (20.0) |
| None smoker | 7 (35.0) |
| **Dust exposure at work** | Yes | 5 (25.0) |
| No | 15 (75.0) |
| **Secondhand smoke exposure** | Yes | 13 (65.0) |
| No | 7 (35.0) |
| **Comorbidity status** | Yes | 12 (60.0) |
|  | No | 8 (40.0) |
| **Participation in pulmonary rehabilitation** | Yes | 7 (35.0) |
| No | 13 (65.0) |
| **Home oxygen therapy** | Yes | 13 (65.0) |
| No | 7 (35.0) |

**Supplementary Table S4** Semi-structured interview guide

| **Topic of qualitative interview:** current situation of pulmonary rehabilitation information needs of COPD patients |
| --- |
| **Interview outline:**  (1) How much do you know about COPD?  (2) What did you do after diagnosis of COPD?  (3) Have you heard of pulmonary rehabilitation before? If yes, what do you know about it? If not, what information about pulmonary rehabilitation would you like to know?  (4) If your doctor recommends pulmonary rehabilitation, what information would you most like to know?  (5) Do you need to add any other contents? |

**Supplementary Table S5** Mapping of interview findings to proposed scale items

| **Interview theme/subtheme** | **Representative quotes** | **Proposed items** | **Relevant scale dimension** |
| --- | --- | --- | --- |
| **Theme 1: Unclear understanding of pulmonary rehabilitation** | | | |
| **Subtheme 1.2: Limited knowledge of COPD-**Patients had limited understanding of the chronic and progressive nature of COPD and its long-term impact on lung function. | **N5:** “I felt better in the past two years, but this year I often feel breathless, and it seems to be getting worse.” | What should I do in daily life to prevent or slow the gradual progression of COPD? | Disease Self-Management Needs |
|  | **N11:** “I did not know that this disease could not be cured. Now I just feel short of breath.” | I want to know what chronic obstructive pulmonary disease (COPD) is (its causes and symptoms) | Disease Self-Management Needs |
|  |  |  |  |
| **Subtheme 1.2: Limited knowledge of pulmonary rehabilitation-**Patients was unfamiliar with the purpose, content, and feasible approaches of pulmonary rehabilitation, including exercise and rehabilitation training. | **N3:** “Can I still do rehabilitation with this disease? No one has told me about it.” | I want to know what pulmonary rehabilitation is (its definition and components). | Disease Self-Management Needs |
|  | **N7:** “I already have difficulty walking. How could I still do exercise? Being able to breathe is already enough for me.” | I want to know what pulmonary rehabilitation is (its definition and components). | Disease Self-Management Needs |
|  |  |  |  |
| **Theme 2: Difficulties in respiratory management** | | | |
| **Subtheme 2.1: Use of ventilatory support devices-**Many patients needed to use ventilatory support devices to relieve dyspnea, but limited instruction and discomfort affected their actual use. | **N2:** “My family bought me a breathing machine before, but I did not know how to use it. Sometimes it felt uncomfortable to wear, so I did not use it much later.” | I want to know how to safely use the home-based ventilator. | Physical therapy technology Needs |
|  | **N3:** “No one taught me how to use the breathing machine. When we bought it, they just told us to read the instructions ourselves. I have only used it a few times since buying it. Everyone said I had to buy one, but what is the point if I do not know how to use it?” | I want to know how to safely use the home-based ventilator. | Physical therapy technology Needs |
| **Subtheme 2.2: Difficulty with sputum clearance-** Patients described difficulty clearing sputum, with chest tightness and disturbed sleep. | **N2:** “It feels like the phlegm is stuck in my throat. I want to cough it out, but I do not have the strength. My breathing often makes a rattling sound, and sometimes it feels hard to breathe.” | I want to know how to clear sputum effectively. | Physical therapy technology Needs |
|  | **N12:** “When I lie down at night, my chest feels tight, as if phlegm is stuck there. I do not sleep well, and even back-patting does not help much.” | I want to know how to clear sputum effectively. |  |
| **Subtheme 2.3: Breathing exercises -**Patients perceived breathing exercises, including chest expansion exercises, diaphragmatic breathing, and pursed-lip breathing, as helpful for relieving dyspnea. | **N6:** “I used to have no problem going upstairs, but now I feel uncomfortable even when walking. When I have time, I do some chest expansion exercises, and they help. I feel better each time after doing them.” | I want to know breathing techniques, such as pursed - lip breathing and diaphragmatic breathing. | Physical therapy technology Needs |
|  | **N7:** “I know that if I stop moving because of this disease, things will only get worse. Sometimes when I lie in bed, I breathe out and then take deep breaths. I try to move whenever I can.” | I want to know breathing techniques, such as pursed - lip breathing and diaphragmatic breathing. | Physical therapy technology Needs |
|  |  |  |  |
| **Theme 3: Difficulties in smoking cessation** | | | |
| **Subtheme 3.1: Limited understanding of the impact of smoking on COPD-** Patients had limited knowledge of COPD and did not clearly recognize the relationship between smoking and the disease. | **N9:** “I started smoking when I was a teenager. Many people who do not smoke or drink also get this disease, so I do not think smoking is a big problem.” | I want to know the benefits of quitting smoking. | Smoking Cessation Needs |
|  | **N12:** “I smoke very little, usually only a few cigarettes a day. That should not really count as smoking, should it? I still felt short of breath even when I did not smoke before.” | I want to know the impact of smoking on COPD. | Smoking Cessation Needs |
| **Subtheme 3.2: Repeated failure to quit smoking-** Patients described repeated quit attempts but found it difficult to maintain abstinence, especially when exposed to smoking or social smoking situations. | **N4:** “I do want to quit smoking. I have tried several times, but whenever I see others smoking or smell cigarette smoke, I feel the urge again. I have thrown away several lighters, but I still could not quit.” | I want to know how to deal with adverse reactions during smoking cessation (like anxiety, depression, nausea, vomiting, palpitations). | Smoking Cessation Needs |
|  | **N11:** “I quit once before, but less than two months later, an old comrade came to visit me and I started smoking again. Later, I felt it did not matter much anymore. At my age, I just take it one day at a time.” | I want to know the benefits of quitting smoking. | Smoking Cessation Needs |
|  |  |  |  |
| **Theme 4: Social support needs** | | | |
| **Subtheme 4.1: Need for practical support-**Patients hoped to receive help with medical care and daily living but were affected by practical difficulties. | **N1:** “I have been to several hospitals. I received treatment at a community clinic before, but later my condition worsened after I caught a cold. I then went to several hospitals, but I was discharged after only a short stay. I still do not know where I should go for the best care.” | I want to know how to seek social support when I encounter difficulties seeing a doctor. | Social Support Needs |
|  | **N7:** “If my daughter had not been taking care of me, I probably would not have managed this long. I cannot do much around the house anymore. She is the only one in the family who has been looking after me. I am putting too much burden on my family.” | I want to know how to seek social support when I encounter difficulties seeing a doctor. | Social Support Needs |
|  |  |  |  |
| **Subtheme 4.2: Need for privacy protection-** Patients wanted to protect their medical privacy because of concerns about treatment costs, family burden, and possible effects on work. | **N8:** “I have been treated for this disease for several years, but it still cannot be cured. I do not want to spend too much money anymore. My children already have a hard time, and I do not want my relatives and friends to worry about me.” | I want to know whether healthcare providers protect my privacy rights during medical care. | Social Support Needs |
|  | **N11:** “I still have to work. I cannot let this disease get in the way of earning money. I have elderly parents and children to support. If my workplace finds out about my illness, they may not keep me on. I just need to get through these two years until retirement.” | I want to know whether healthcare providers protect my privacy rights during medical care. | Social Support Needs |
|  |  |  |  |
| **Theme 5: Exercise guidance** | | | |
| **Subtheme 5.1: Limited knowledge of safe exercise-** Patients were unsure how to exercise appropriately according to their own condition. | **N3:** “I still feel quite young, and the doctor told me to exercise more. But I do not know what kind of exercise would be best for me. After work, I just take a walk and move my arms and legs a bit.” | I want to know home-based exercise training methods. | Exercise Training Needs |
|  | **N6:** “I can still do some farm work at home. Since they say I should exercise, surely the work I do every day counts as exercise. Sometimes I am busy with farm work from morning until evening.” | I want to know home-based exercise training methods. | Exercise Training Needs |
| **Subtheme 5.2: Managing unexpected situations during exercise-**Exercise may involve discomfort or unexpected situations, such as dizziness, suspected hypoglycemia, and breathlessness. | **N5:** “I have diabetes. Once, when I was on my way home after picking up my grandchild from school, I felt very dizzy. It was probably low blood sugar. I ate something after I got home, but it still took a long time before I felt better.” | If I have diabetes or cardiovascular/cerebrovascular disease, what precautions should I take during exercise? | Exercise Training Needs |
|  | **N10:** “I used to dance in the square with a few friends at night when I had time. Sometimes after dancing for a while, I felt I could not catch my breath and had to rest for a long time. Now I go less often.” | I want to know at what point I can stop exercise training. | Exercise Training Needs |
|  |  |  |  |
| **Theme 6: Emotional distress and coping** | | | |
| **Subtheme 6.1: Coping with anxiety and depressive symptoms-** | **N7:** “Sometimes when I cannot breathe well, I feel anxious and upset. I do not know how to calm myself down.” | I want to know how to cope with negative emotions such as anxiety or depression. | Psychological Needs |
|  | **N10:** “This disease keeps coming back again and again, and sometimes it makes me feel really down.” | I want to know how to cope with negative emotions such as anxiety or depression. | Psychological Needs |
| **Subtheme 6.2: Stress relief in daily life-** | **N8:** “I have been treated for this disease for years, and it has cost my family a lot of money. The financial pressure is heavy, and I feel stressed too.” | I want to know what I can do in my daily life to relieve my stress. | Psychological Needs |
|  | **N2:** “My family members are all busy. Sometimes when I feel irritable, I go out for a walk by myself.” | I want to know what I can do in my daily life to relieve my stress. | Psychological Needs |

**Supplementary Table S6** Results of expert consultation

|  | **Dimension** | **Item** |
| --- | --- | --- |
| The first round of expert consultation | One dimension was modified: “Physical therapy technology Needs” was revised to “Breathing and Sputum Clearance Training Needs” | **1. Five items were modified:**  1.1 “What should I do in daily life to prevent or slow the gradual progression of COPD?” to “I want to know how to prevent acute exacerbations of COPD”  1.2 “I want to know what precautions I should take when going out.” to “I want to know how to protect myself when going out, especially in bad weather.”  1.3 “I want to know at what point I can stop exercise training.” to “I want to know how to perform aerobic exercise (exercise modality, exercise intensity, and duration).”  1.4 “In daily life, how should I cooperate to facilitate smoking cessation?” to “I want to know what tips can help me quit smoking in daily life.”  1.5 “How can I obtain my medical-related records (e.g., medical records)?” to “I want to know how to get my medical records.”  **2. Seven items were added:**  2.1 I want to know how to conserve energy in my daily life.  2.2 I want to know how to improve my nutritional status by diet.  2.3 I want to know when I should receive influenza and pneumococcal vaccinations.  2.4 I want to know how to perform nebulized inhalation therapy at home.  2.5 I want to know whether e-cigarettes can help me quit smoking.  2.6 I want to know what to do if I relapse after quitting smoking.  2.7 When I have psychological problems, I want to know the time to seek help from a psychologist.  **3. Five items were removed**  3.1 I want to know what pulmonary rehabilitation is (its definition and components).  3.2 I want to know what to do if my shortness of breath worsens.  3.3 I want to know what precautions I should take when using medications.  3.4 I want to know how to choose home oxygen equipment properly and how to perform home oxygen therapy.  3.5 I want to know what kind of training can improve my physical endurance. |
|  | **Dimension** | **Item** |
| The second round of expert consultation | No change | **1. Five items were modified:**  1.1 “I want to know the commonly used medications for COPD and the precautions for medication use (oral and inhaled).” to “I want to know the precautions for using inhaled medications.”  1.2 “How to progressively perform resistance training at different levels of intensity?” to “I want to know how to gradually exercise according to my condition.”  1.3 “I want to know how to perform ankle pump exercises.” to “I want to know whether I am suitable for exercise training.”  1.4 “I want to know whether e-cigarettes can help me quit smoking.” to “I want to know the harmful effects of e-cigarettes.”  1.5 “I want to know how to perform aerobic exercise (exercise modality, exercise intensity, and duration).” to “I want to know what aerobic exercise is.”  **2. Five items were removed**  2.1 I want to know how to use breathing control in daily life to achieve relaxation.  2.2 I want to know how to use devices to perform effective airway clearance (airway clearance techniques).  2.3 I want to know how to exchange experiences with other patients.  2.4 If I have diabetes or cardiovascular/cerebrovascular disease, what precautions should I take during exercise?  2.5 I want to know what tips can help me quit smoking in daily life. |

**Supplementary Table S7** PRIN-COPD scale, Final Version

| Items translated English version* |
| --- |
| I want to know what chronic obstructive pulmonary disease (COPD) is (its causes and symptoms) |
| I want to know how to prevent acute exacerbations of COPD |
| I want to know how to conserve energy in my daily life. |
| I want to know the precautions for using inhaled medications. |
| I want to know the side effects of the inhaled medication. |
| I want to know the importance of long-term home oxygen therapy for COPD. |
| I want to know the precautions for long - term home oxygen therapy (e.g., duration of oxygen use, flow - rate, and safety tips). |
| I want to know how to easily assess my own nutritional status. |
| I want to know how to improve my nutritional status by diet. |
| I want to know how to protect myself when going out, especially in bad weather. |
| I want to know when I should see the doctor immediately. |
| I want to know when I should receive influenza and pneumococcal vaccinations. |
| I want to learn about the latest advancements in COPD (new treatment options, new pulmonary rehabilitation techniques, new medications, etc.). |
| I want to know how to relax by changing positions (sitting, standing, lying down). |
| I want to know breathing techniques, such as pursed - lip breathing and diaphragmatic breathing. |
| I want to know how to clear sputum effectively. |
| I want to know how to perform nebulized inhalation therapy at home. |
| I want to know how to safely use the home-based ventilator. |
| I want to understand how exercise training can improve lung condition. |
| I want to know what conditions are necessary for safe exercise training. |
| I want to know home-based exercise training methods. |
| I want to know how to gradually exercise according to my condition. |
| I want to know whether I am suitable for exercise training. |
| I want to know the impact of smoking on COPD. |
| I want to know the benefits of quitting smoking. |
| I want to know the medical interventions (e.g., cessation medications, nicotine gum, nicotine patches) that can support smoking cessation. |
| I want to know whether exposure to secondhand smoke affects my condition. |
| I want to know the harmful effects of e-cigarettes. |
| I want to know how to deal with adverse reactions during smoking cessation (like anxiety, depression, nausea, vomiting, palpitations). |
| I want to know what to do if I relapse after quitting smoking. |
| I want to know how to seek social support when I encounter difficulties seeing a doctor. |
| I want to know how to obtain information about my health insurance. |
| I want to know how to get my medical records. |
| I want to know whether healthcare providers protect my privacy rights during medical care. |
| I want to know the symptoms of mental health problems. |
| I want to know how to cope with negative emotions such as anxiety or depression. |
| I want to know what I can do in my daily life to relieve my stress. |
| I want to know if I have received respect during medical care. |
| When I have psychological problems, I want to know the time to seek help from a psychologist. |
|  |

* Note: This is an initial and preliminary translation of the original questionnaire. It has not yet been psychometrically evaluated.

Response scheme: 1=Not at all, 2=little agree, 3=agree, 4=Relatively agree, 5=Absolutely agree
